## Erratum

### **Egfr signaling regulates ommatidial rotation and cell motility in the *Drosophila* eye via MAPK/Pnt signaling and the Ras effector Canoe/AF6**

Gaengel, K. and Mlodzik, M. *Development* **130**, 5413-5423.

An error in this article was not corrected before going to press.

In Fig. 5, the arrows between Ras<sup>V12C40</sup> and PI3K, and Ras<sup>V12C40</sup> and Rgl were missing in panels D and F.

We apologise to readers and the authors for this mistake.
